# Supplementary material
Source: PubMed Central journal article supplement (PMC2890708)
Supplement: 1000530107_pnas.201000530SI.pdf [file 1000530107_pnas.201000530SI.pdf]

# Supporting Information

Koh and Ghazoul 10.1073/pnas.1000530107

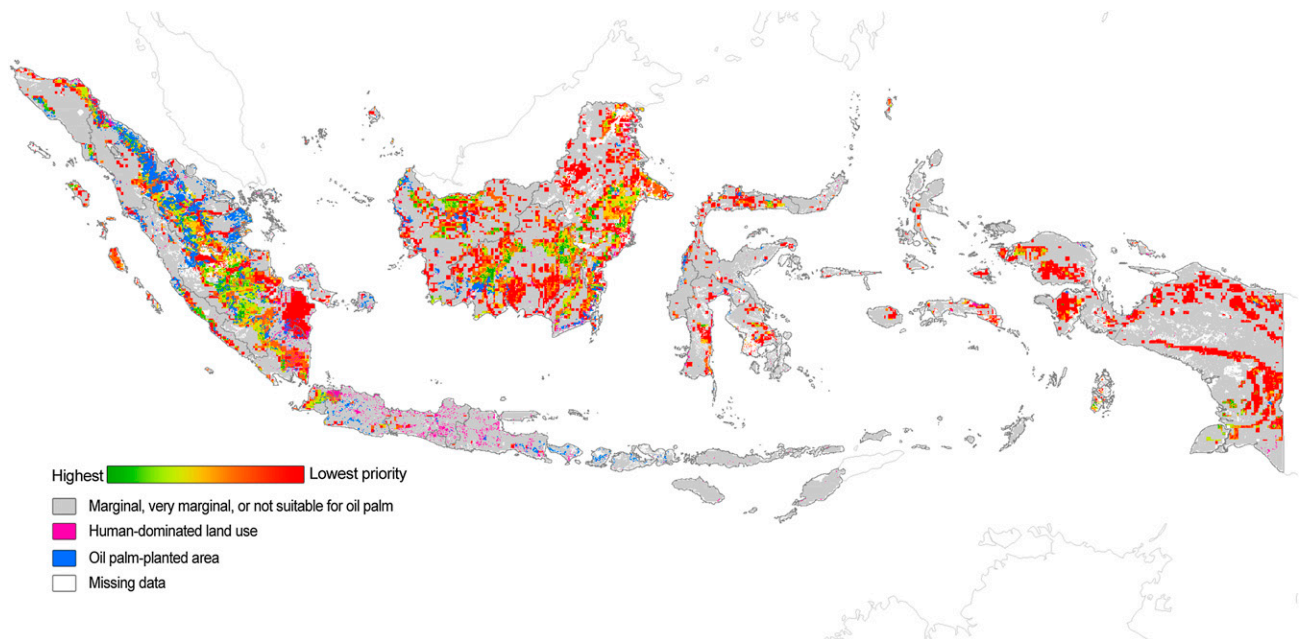

**Fig. S1.** Priority areas for oil-palm development in Indonesia under the hybrid approach. Implementing this development scenario avoided any impact on primary and secondary forests and biodiversity; and ameliorated the impacts of expansion on carbon stocks (limiting loss to 191.6 million tons) and annual food production capacity (loss of 1.9 million tons).
